# Supplementary material
Source: PubMed Central journal article supplement (PMC7089843)
Supplement: NIHMS1051596-supplement-Supp_info.pdf [file NIHMS1051596-supplement-Supp_info.pdf]

## Supplemental Information

### Materials and reagents.

Antibodies for MLL4 (ABE167) and MLL3 (ABE1851) were purchased from Millipore; for KLF4 (AF3158) from R&D system; for SHP (ab186874) from Abcam; for F4/80 (NB600-404SS) from Novus Biologicals; for LAMIN A (sc-20680) and  $\beta$ -TUBULIN (sc-9104) from Santa Cruz Biotechnology, and for  $\beta$ -ACTIN (CST-4970) from Cell Signaling Technology. Small interfering RNAs (ON-TARGETplus SMART pool) for *Klf4* (M-066785-00-0005), *Ahr* (M-044066-01-0005) and *Lrh1* (M-047044-00-0005) were purchased from Dharmacon. The target vector for lentivirus construction for the precursor of miR-210 (MmiR3303-MR03) was purchased from GeneCopoeia and for anti-miR-210 (mm30343) from Applied Biological Materials Inc. The lentiviral packaging vectors, psPAX2 (12260) and pMD2.G (12259) were obtained from Addgene. The miR-210 miRNA precursor (mmu-miR-210-3p, AM17100) and anti-miR-210 (mmu-miR-210-3p, AM17000) were purchased from Thermo Fisher. Lentiviruses expressing shRNA for *Mll4* and expression vectors for KLF4 were purchased from VectorBuilder.

## Supplemental Figures

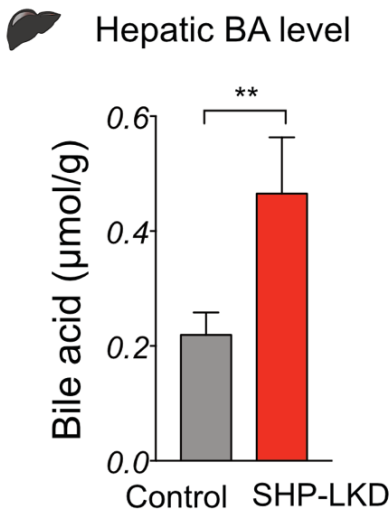

**Supplemental Figure S1. Increased hepatic BA levels in SHP-LKD mice compared to control mice.** SHP was downregulated as described in the Fig.1 legend and hepatic BA levels were measured. Statistical significance was determined by the Student's t-test, SD (n=5), \*\*  $p < 0.01$ .

**A**
 HEK293 (*miR-210* overexpression)
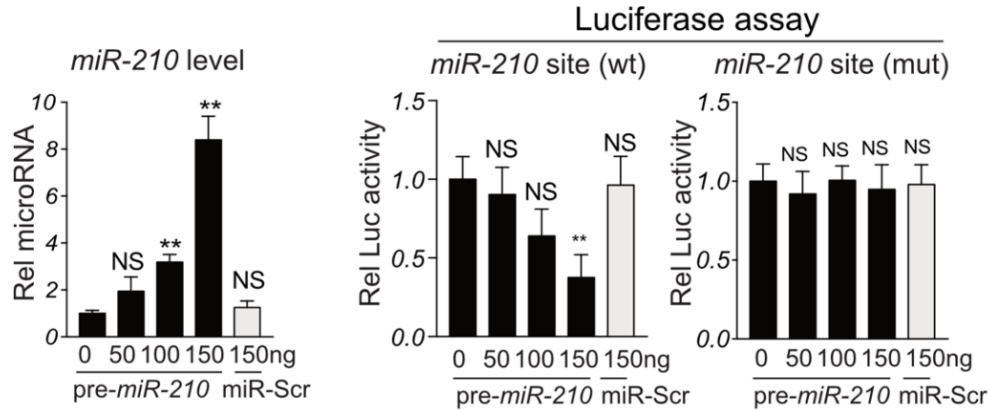**B**
 HEK293 (*miR-210* down-regulation)
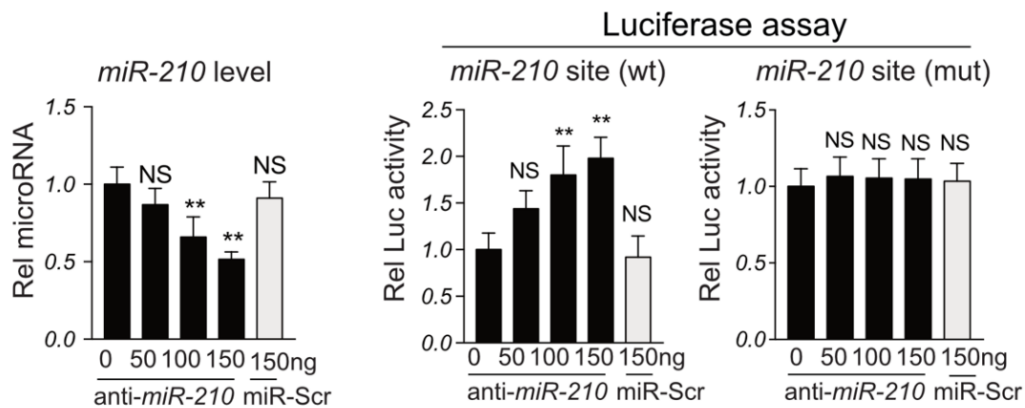

### Supplemental Figure S2. MiR-210 inhibits MLL4 expression in human HEK293 cells.

HEK293 cells were transfected with the indicated luciferase plasmids and with the indicated amounts of pre-miR-210 (A), anti-miR-210 (B), or scrambled RNA (miR-Scr) as a control, and 48 h later, luciferase activity was determined and normalized to  $\beta$ -galactosidase activity. Statistical significance was determined by one-way ANOVA, SD (n=3), \*\* p < 0.01, NS, not significant.

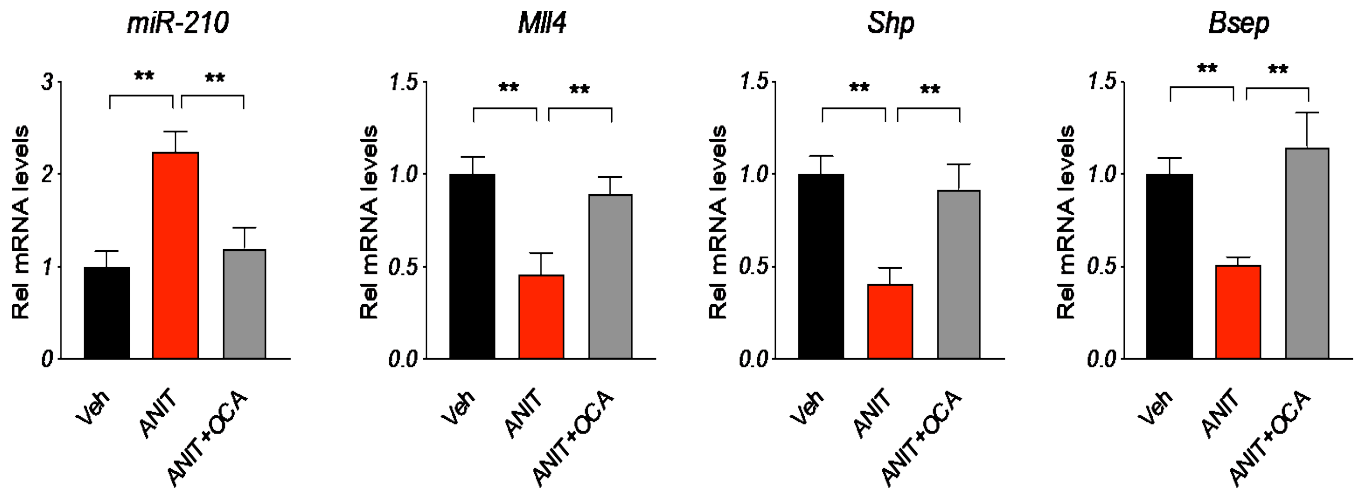

**Supplemental Figure S3. Activation of FXR in cholestatic mice can reverse the increase in miR-210 levels.** To examine the effects of OCA on ANIT-induced cholestasis, mice were treated with vehicle or 10 mg/kg of OCA, i.p., and after five days, treated with 35 mg/kg ANIT by gavage daily for 2 days. Hepatic mRNA levels of indicated genes were determined by RT-qPCR analysis. Statistical significance was determined by one-way ANOVA, SD (n=5), \*\* p < 0.01.

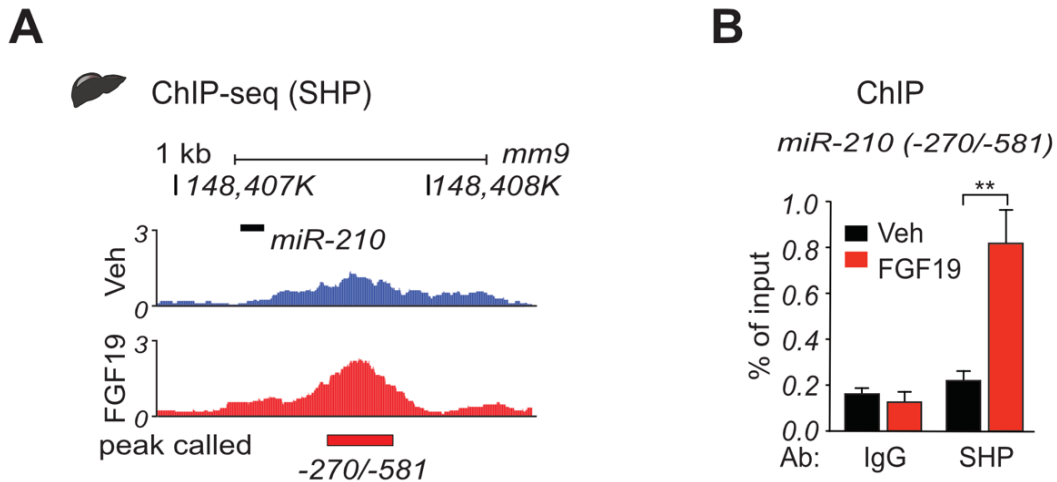

**Supplemental Figure S4. SHP occupancy is increased at the hepatic miR-210 promoter in response to FGF19 treatment.** (A) SHP binding peak at the hepatic miR-210 promoter from published ChIP-seq data (11). (B) Mice were fasted overnight and treated with vehicle or FGF19 for 2 h and standard liver ChIP assays were done to confirm SHP occupancy at the *miR-210* gene promoter. Statistical significance was determined by two-way ANOVA, SD (n=5), \*\* p < 0.01.

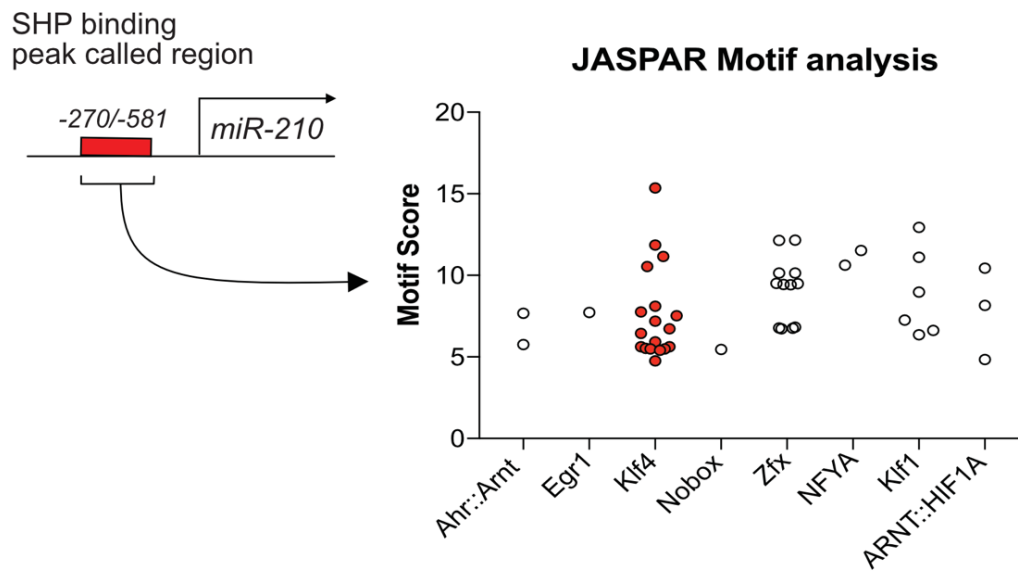

**Supplemental Figure S5. Potential transcription factor binding sites within the SHP binding peak region (312 bp) at the miR-210 promoter.** Potential binding sites for transcription factors detected by ChIP-seq were determined using the JASPAR online program (2018; <http://jaspar.genereg.net/>). The JASPAR motif scores for the individual potential binding motifs for the indicated factors are plotted.

**A**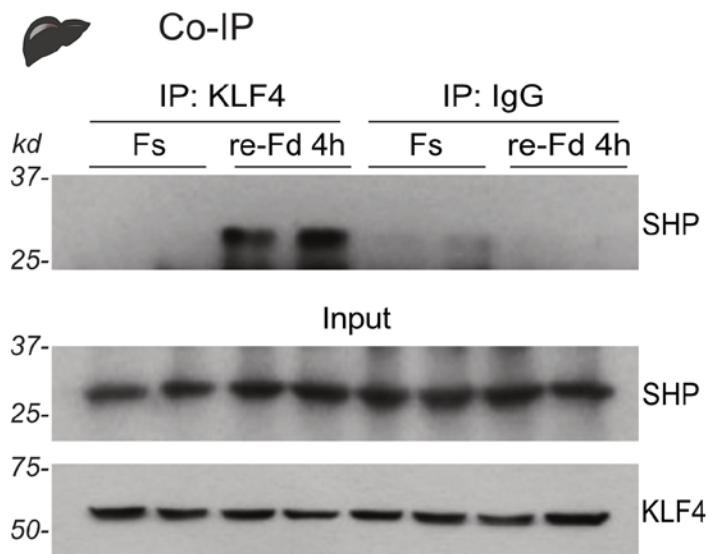**B**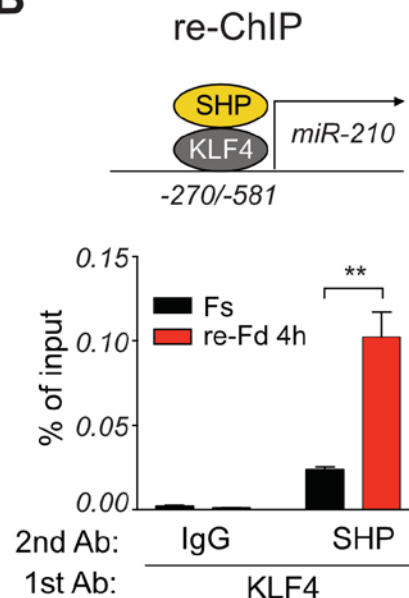

**Supplemental Figure S6. Functional interaction between SHP and KLF4 is increased in the late fed-state.** C57BL/6J mice were refed for 4 h after fasting overnight. **(A) CoIP:** SHP protein levels in anti-KLF4 or IgG immunoprecipitates and SHP and KLF4 protein levels in the input samples. **(B) Re-ChIP:** Chromatin was immunoprecipitated with KLF4 antibody and then, eluted and re-precipitated with SHP antibody. Enrichment of the *miR-210* promoter sequence determined by qPCR. Statistical significance was determined by two-way ANOVA, SD (n=5), \*\* p < 0.01.

## Supplemental Table S1

### Mouse RT-qPCR primers

|               | Forward (5'-3')         | Reverse (5'-3')          |
|---------------|-------------------------|--------------------------|
| <i>Cxcl2</i>  | TCCAGAGCTTGAGTGTGACG    | TTCAGGGTCAAGGCAAACCTT    |
| <i>Tnfa</i>   | AGCCCCCAGTCTGTATCCTT    | GGTCACTGTCCCAGCATCTT     |
| <i>Shp</i>    | CAAGAAGATTCTGCTGGAGG    | GGATGTCAACATCTCCAATG     |
| <i>Klf4</i>   | CTGAACAGCAGGGACTGTCA    | GTGTGGGTGGCTGTTCTTTT     |
| <i>Cyp7a1</i> | AACGGGTTGATTCCATACCTGG  | GTGGACATATTTCCCCATCAGTT  |
| <i>Cyp8b1</i> | GAATCTAACCAGGCCATGCT    | AGGAGCTGGCACCTAGACT      |
| <i>Fgf15</i>  | GTTTCACCGCTCCTTCTTTG    | CATCCTCCACCATCCTGAAC     |
| <i>36b4</i>   | CGACATCACAGAGCAGGC      | CACCGAGGCAACAGTTGG       |
| <i>Bsep</i>   | CAATGTTCAAGTTCCTCCGTTCA | TTTGGTGTGTCCCCSTSCCTTG   |
| <i>Mrp2</i>   | TATCCCCGGGAAATCTGTTC    | TAACCAACATTCTCCGCGC      |
| <i>Oatp1</i>  | GTCTTACGAGTGTGCTCCAGAT  | GGAATACTGCCTCTGAAGTGGATT |
| <i>Ntcp</i>   | TACCTCCTCCCTGATGCCTTTC  | TGCGTCTGCAGCTTGGATTTA    |
| <i>Mll3</i>   | GCAACCTCTTACCGGTTGAA    | GTTCTCTCGGGAACCCTTGT     |
| <i>Mll4</i>   | GCACCGAGTGGAGAGACAAT    | TAAATACCCGCGGTTCTGCTC    |
| <i>Ahr</i>    | TCCACAACCTGGCTTTGTTTG   | CCAGAATAAGCTGCCCTTTG     |
| <i>Lrh-1</i>  | TCATGCTGCCCAAAGTGGAGA   | TGGTTTTGGACAGTTCGCTT     |
| <i>Cck</i>    | AAGTGACCGGGACTACATGG    | CCCCTACGATGGGTATTTCG     |
| <i>Mdr1</i>   | CTGGTGTGCTCATAGTTG      | CCTAATCTTGTGTATCTGTCTT   |

### Mouse ChIP primers

|             | Forward (5'-3')      | Reverse (5'-3')         |
|-------------|----------------------|-------------------------|
| <i>Shp</i>  | CAGTGAGAACCCTGGTCTT  | CTGGCCAAACAACCTTGAC     |
| <i>Bsep</i> | CGACCTTTCCTCTCATGTCA | CATTGAACAGAAATCAGGCTTTT |

### Human RT-qPCR primers

|             | Forward (5'-3')      | Reverse (5'-3')       |
|-------------|----------------------|-----------------------|
| <i>KLF4</i> | ACCCTGGGTCTTGAGGAAGT | ACGATCGTCTTCCCCTCTTT  |
| <i>36B4</i> | TGCTGAACATGCTCAAC    | GTCGAACACCTGCTGGATGAC |
| <i>SHP</i>  | CAGAGATCAGGTGGGCAGAG | TGTGGCTGAGTGAAGAGCTG  |
| <i>MLL4</i> | GCACAATGCTGTCAGGAGAA | GTGCAGCAGAAGATGGTGAA  |
